# Supplementary material for: Analgesic Efficacy of Etoricoxib following Third Molar Surgery: A Meta-analysis
Source: Hindawi journal article supplement (doi:10.1155/2021/9536054), 2021-09-09
Supplement: f1 [file 9536054.f1.pdf]

**Table S1.** Characterization of the high-quality studies.

| First author and study design                                                  | Treatments (n) and type of strategy for pain control                                                                                                                                         | Patients, surgical procedure, and rescue analgesic                                            | Evaluation of the clinical efficacy                                                                                                                                                                                        | Loss to follow-up                  | Conclusion                                                           |
|--------------------------------------------------------------------------------|----------------------------------------------------------------------------------------------------------------------------------------------------------------------------------------------|-----------------------------------------------------------------------------------------------|----------------------------------------------------------------------------------------------------------------------------------------------------------------------------------------------------------------------------|------------------------------------|----------------------------------------------------------------------|
| Albuquerque et al (17).<br>Randomized, triple-blind, crossover clinical study. | Group A: Etoricoxib 120 mg 1 h before surgery (n = 24).<br>Group B: Ibuprofen 400 mg 1 h before surgery (n = 24).<br>Group C. Placebo 1 h before surgery (n = 24).<br>Pre-emptive analgesia. | Healthy patients (ASA I).<br>Third molar surgery.<br>Ibuprofen 300 mg.                        | The visual analog scale (VAS) was used for the evaluation of pain at 0, 2, 4, 6, 8, 10, 12, 24, 48, and 72-h and 7-days post-extraction.<br>Total consumption of rescue analgesics.<br>Adverse effects were not evaluated. | There were no losses to follow up. | The conclusion did not include the analgesic efficacy of treatments. |
| Albuquerque et al (18).<br>Randomized, triple-blind, crossover clinical study. | Group A: Etoricoxib 120 mg 1 h before surgery (n = 5).<br>Group B: Ibuprofen 400 mg 1 h before surgery (n = 5).                                                                              | Healthy patients (ASA I).<br>Third molar surgery.<br>No rescue analgesic medication was used. | VAS was used for the evaluation of pain at 0, 2, 4, 6, 8, 10, 12, 24, 48,                                                                                                                                                  | No losses were reported.           | The conclusion did not include the analgesic efficacy of treatments. |

|                                                                          |                                                                                                                                                                                                                                                                                                                                                                 |                                                                            |                                                                                                                                                                                                                                                               |                                                                              |                                                                                                  |
|--------------------------------------------------------------------------|-----------------------------------------------------------------------------------------------------------------------------------------------------------------------------------------------------------------------------------------------------------------------------------------------------------------------------------------------------------------|----------------------------------------------------------------------------|---------------------------------------------------------------------------------------------------------------------------------------------------------------------------------------------------------------------------------------------------------------|------------------------------------------------------------------------------|--------------------------------------------------------------------------------------------------|
|                                                                          | Group C: Placebo 1 h before surgery (n = 5).<br>Pre-emptive analgesia.                                                                                                                                                                                                                                                                                          |                                                                            | and 72-h and 7-days post-extraction.<br>Adverse effects were not assessed.                                                                                                                                                                                    |                                                                              |                                                                                                  |
| Brown et al (19).<br>Randomized, double-blind, parallel, clinical trial. | Group A: Etoricoxib 90 mg once daily for three days (n = 188).<br>Group B: Etoricoxib 120 mg once daily for three days (n = 95).<br>Group C: Ibuprofen 600 mg every 6 h for three days (n = 189).<br>Group D: Acetaminophen 600 mg / Codeine 60 mg every 6 h for three days (n = 56).<br>Group E: Placebo for three days (n = 45).<br>Post-operative analgesia. | Healthy patients (ASA I).<br>Third molar surgery.<br>Acetaminophen 325 mg. | Recall of average and worst pain.<br>Patient global assessments using a 4 categorical scale (where 0= poor and 4= excellent).<br>Use of rescue medication.<br>Incidence of adverse effects.<br>All these variable were evaluated a 24 and 48 h after surgery. | Group A = 3.<br>Group B = 2.<br>Group C = 3.<br>Group D = 6.<br>Group E = 1. | Etoricoxib was superior for the management of pain than ibuprofen following third molar removal. |

|                                                                               |                                                                                                                                                                                                                                                                               |                                                                                                                |                                                                                                                                                                                                      |                             |                                                                                                                                                     |
|-------------------------------------------------------------------------------|-------------------------------------------------------------------------------------------------------------------------------------------------------------------------------------------------------------------------------------------------------------------------------|----------------------------------------------------------------------------------------------------------------|------------------------------------------------------------------------------------------------------------------------------------------------------------------------------------------------------|-----------------------------|-----------------------------------------------------------------------------------------------------------------------------------------------------|
| Calvo et al (20).<br>Randomized, double-blind,<br>crossover, study.           | Group A: Etoricoxib 120 mg once<br>daily for four days (n = 16).<br><br>Group B: Ibuprofen 600 mg every six<br>h for four days (n = 16).<br><br>Post-operative analgesia.                                                                                                     | Healthy patients (ASA I).<br>Third molar surgery.<br>Acetaminophen 750 mg.                                     | VAS was used for the<br>evaluation of pain at 0,<br>24, 48, 72, and 96 h<br>following surgical<br>removal.<br><br>Total consumption of<br>rescue analgesics.<br><br>Incidence of adverse<br>effects. | No losses were<br>reported. | Similar efficacy of<br>etoricoxib and ibuprofen<br>for control of pain and<br>trismus after third molar<br>surgery.                                 |
| Daniels et al (21).<br>Randomized, double-blind,<br>parallel, clinical trial. | Group A: Etoricoxib 90 mg once a<br>day (n = 191).<br><br>Group B: Etoricoxib 120 mg once a<br>day (n = 97).<br><br>Group C: Ibuprofen 600 mg every six<br>h for 24 h (n = 192).<br><br>Group D: Acetaminophen 600 mg /<br>Codeine 60 mg every six h for one<br>day (n = 62). | Healthy patients (ASA I).<br>Third molar surgery.<br>Hydrocodone bitartrate 5<br>mg / acetaminophen 500<br>mg. | Total pain relief at 6 h<br>(TOPAR6), overall<br>evaluation at 24 h, onset<br>of analgesia, peak<br>analgesic action, duration<br>of analgesic activity, and<br>incidence of adverse<br>events.      | No losses were<br>reported. | Etoricoxib 90 mg and 120<br>mg produced similar<br>efficacy than ibuprofen<br>for the control of<br>postoperative pain<br>following dental surgery. |

|                                                                              |                                                                                                                                                                                                                      |                                                                                               |                                                                                                                                                                                                    |                           |                                                                                                          |
|------------------------------------------------------------------------------|----------------------------------------------------------------------------------------------------------------------------------------------------------------------------------------------------------------------|-----------------------------------------------------------------------------------------------|----------------------------------------------------------------------------------------------------------------------------------------------------------------------------------------------------|---------------------------|----------------------------------------------------------------------------------------------------------|
|                                                                              | Group E: Placebo every six h for a day (n = 46).<br>Post-operative analgesia.                                                                                                                                        |                                                                                               |                                                                                                                                                                                                    |                           |                                                                                                          |
| Isola et al (22).<br>Randomized, triple-blind, crossover clinical study.     | Group A: Etoricoxib 120 mg twice a day for five days (n = 32).<br>Group B: Diclofenac 50 mg twice a day for five days (n = 32).<br>Group C: Placebo twice a day for five days (n = 33).<br>Post-operative analgesia. | Healthy patients (ASA I).<br>Third molar surgery.<br>Rescue medication was not indicated.     | VAS was used for the evaluation of pain at 30 minutes, 2, 6, 12, 24, 48 h, 7 and 10-days after dental surgery.<br>The peak postoperative pain score.                                               | Losses were not reported. | Etoricoxib showed better analgesic activity than diclofenac and placebo after third molar removal.       |
| Malmstrom et al (23).<br>Randomized, double-blind, parallel, clinical trial. | Group A: Single oral dose of etoricoxib 120 mg (n = 50).<br>Group B: Single oral dose of naproxen sodium 550 mg (n = 51).<br>Group C: Single oral dose of acetaminophen 600 mg / codeine 60 mg (n = 50).             | Healthy patients (ASA I).<br>Third molar surgery.<br>Acetaminophen 500 mg / hydrocodone 5 mg. | TOPAR8, overall assessment scale at 8- and 24-h, patients needed to take rescue analgesics in 24 h post-extraction, onset of analgesia, peak analgesic action, duration of analgesic activity, and | Losses were not reported. | Similar analgesia was observed for etoricoxib and naproxen sodium after the extraction of third molars.. |

|                                                                              |                                                                                                                                                                                                                                                                                                                                                                                       |                                                                                               |                                                                                                                                                                                                                                    |                                    |                                                                            |
|------------------------------------------------------------------------------|---------------------------------------------------------------------------------------------------------------------------------------------------------------------------------------------------------------------------------------------------------------------------------------------------------------------------------------------------------------------------------------|-----------------------------------------------------------------------------------------------|------------------------------------------------------------------------------------------------------------------------------------------------------------------------------------------------------------------------------------|------------------------------------|----------------------------------------------------------------------------|
|                                                                              | Group D: Single oral dose of placebo (n = 50).<br>Post-operative analgesia.                                                                                                                                                                                                                                                                                                           |                                                                                               |                                                                                                                                                                                                                                    | incidence of adverse reactions.    |                                                                            |
| Malmstrom et al (24).<br>Randomized, double-blind, parallel, clinical trial. | Group A: Single oral dose of Etoricoxib 60 mg (n = 75).<br>Group B: Single oral dose of etoricoxib 120 mg (n = 76).<br>Group C: Single oral dose of etoricoxib 180 mg (n = 74).<br>Group D: Single oral dose of etoricoxib 240 mg (n = 76).<br>Group E: Single oral dose of ibuprofen 400 mg (n = 48).<br>Group F: Single oral dose of placebo (n = 49).<br>Post-operative analgesia. | Healthy patients (ASA I).<br>Third molar surgery.<br>Acetaminophen 500 mg / hydrocodone 5 mg. | TOPAR8, overall assessment scale at 8- and 24-h, patients needed to take rescue analgesics in 24 h post-extraction, onset of analgesia, peak analgesic action, duration of analgesic activity, and incidence of adverse reactions. | There were no losses to follow-up. | Etoricoxib had better pain management than ibuprofen after dental surgery. |

---
